# Supplementary material for: Maternal BCAS2 protects genomic integrity in mouse early embryonic development
Source: Oxford University Press journal article supplement (doi:10.1242/dev.129841), 2015-01-01
Supplement: dev129841supp.pdf [file dev129841supp.pdf]

## Supplemental figures Legends, tables and figures

Xu et al.,

### Maternal BCAS2 protects genomic integrity through RPA in mouse preimplantation embryos

Qianhua Xu<sup>1,2,7</sup>, Fengchao Wang<sup>3,7</sup>, Yunlong Xiang<sup>1</sup>, Xiaoxin Zhang<sup>1</sup>, Zhenao Zhao<sup>1</sup>, Zheng Gao<sup>1,2</sup>, Wenbo Liu<sup>1</sup>, Xukun Lu<sup>1,2</sup>, Yusheng Liu<sup>1</sup>, Xing-jiang Yu<sup>1</sup>, Haibin Wang<sup>1</sup>, Jun Huang<sup>4</sup>, Zhaohong Yi<sup>5</sup>, Shaorong Gao<sup>6,8</sup>, Lei Li<sup>1,8</sup>

<sup>1</sup>State Key Laboratory of Stem Cell and Reproductive Biology, Institute of Zoology, Chinese Academy of Sciences, Beijing, 100101, China. <sup>2</sup>University of Chinese Academy of Sciences, Beijing, 100049, China. <sup>3</sup>National Institute of Biological Sciences, Beijing, 102206, China. <sup>4</sup>Life Sciences Institute, Zhejiang University, Hangzhou, Zhejiang, 310058, China. <sup>5</sup>College of Biological Science and Engineering, Beijing University of Agriculture, Beijing, 102206, China. <sup>6</sup>School of Life Sciences and Technology, Tongji University, Shanghai, 200092, China.

Figure S1

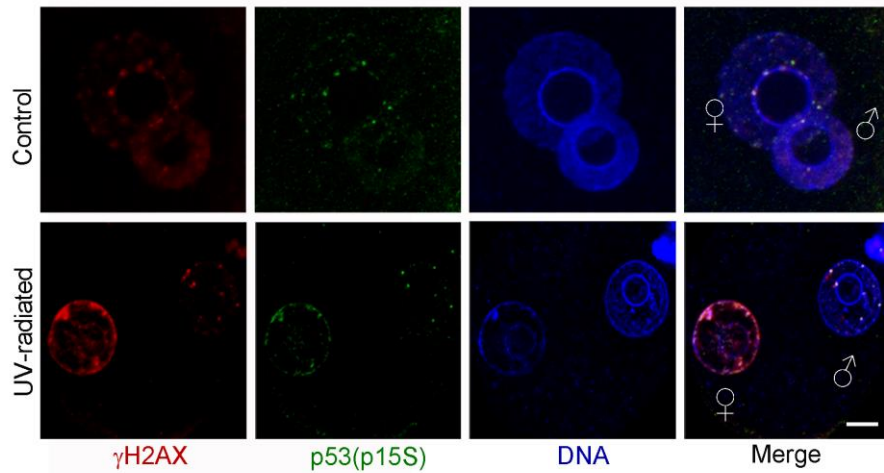

**Fig. S1. BCAS2 responses to UV-induced DNA damage.** MII oocytes were UV-irradiated and *in vitro* fertilized with normal sperms. Zygotes were cultured until PN4-5 and immunostained with phosphor-p53 (p15S) and  $\gamma$ H2AX. Male- and female pronuclei are indicated with male and female symbols, respectively. Scale bar, 10  $\mu$ m.

Figure S2

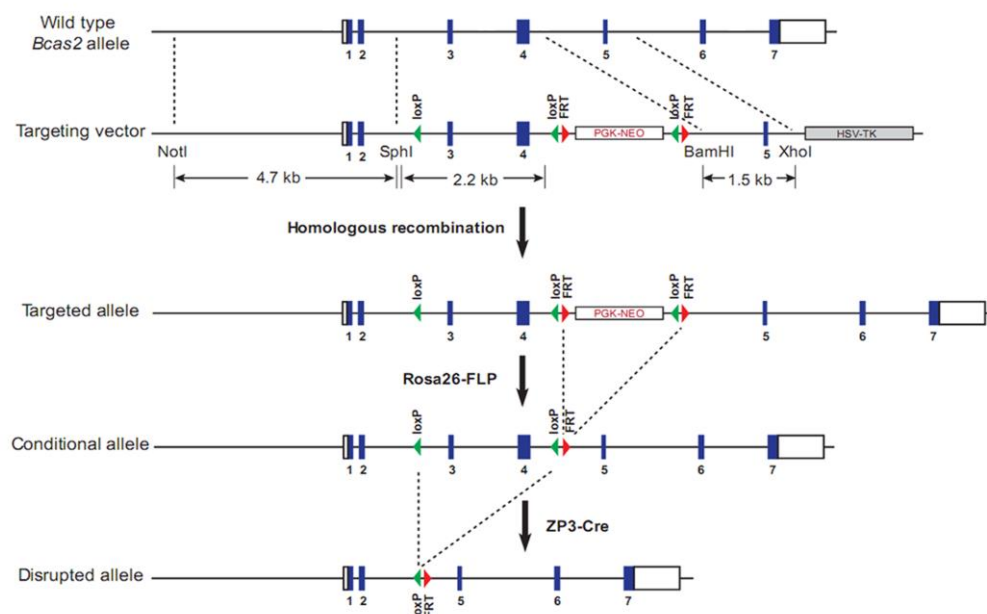

**Fig. S2. *Bcas2* targeting strategy and analysis of F2 offspring.** A targeting vector was constructed by anchoring LoxP sites around exon 3 and exon 4. HSV-TK expression was used for negative selection, and PGK-NEO expression was used for positive selection. Targeted ES clones were confirmed by sequencing and injected into blastocysts to produce chimeric mice.

Figure S3

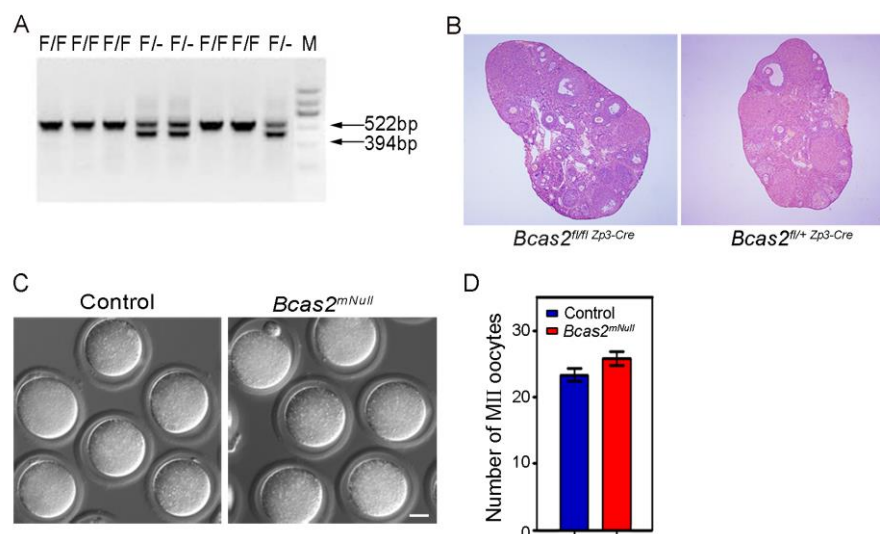

**Fig. S3. Characterization of *Bcas2*<sup>fl/fl</sup> and *Bcas2*<sup>fl/fl</sup>;Zp3-Cre mice.** (A) PCR analysis of genomic DNA derived from eight offspring. (B) Ovaries from two-month old *Bcas2*<sup>fl/+</sup>;Zp3-Cre and *Bcas2*<sup>fl/fl</sup>;Zp3-Cre females were fixed and stained with hematoxylin and eosin. Scale bar, 50  $\mu$ m. (C and D) MII oocytes were obtained from *Bcas2*<sup>fl/+</sup>;Zp3-Cre and *Bcas2*<sup>fl/fl</sup>;Zp3-Cre females after 13 hours post-hCG. Scale bar, 20  $\mu$ m.

Figure S4

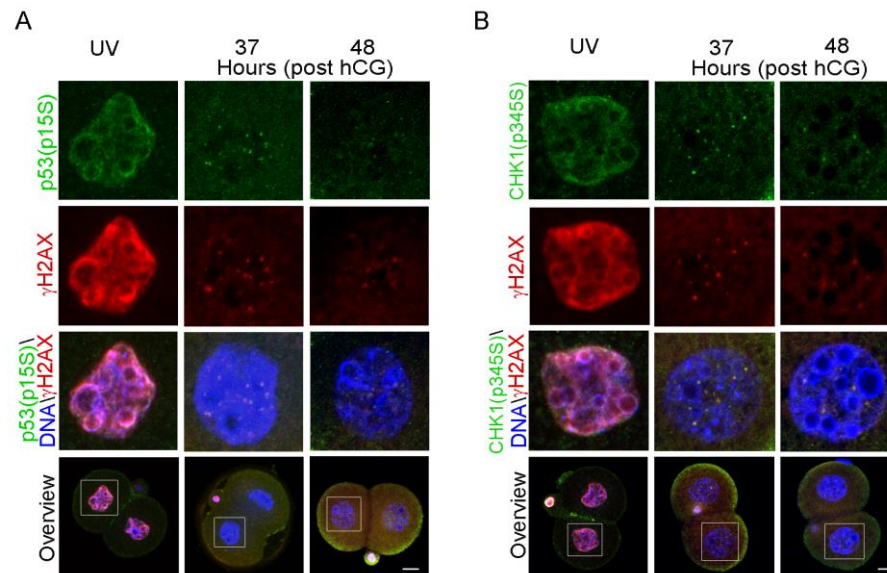

**Fig. S4. Checkpoint activation during cell cycle progression in normal two-cell embryos.** (A) Normal two-cell embryos at 37 and 48 hrs post-hCG were fixed and stained with  $\gamma$ H2AX and phosphor-p53 (S15) antibodies under TP conditions. (B) Normal two-cell embryos at 37 and 48 hours post-hCG were fixed and stained with  $\gamma$ H2AX and phosphor-pCHK1(S345) antibodies under TP conditions. Normal two-cell embryos irradiated by UV were positive control. Scale bar, 20  $\mu$ m.

Figure S5

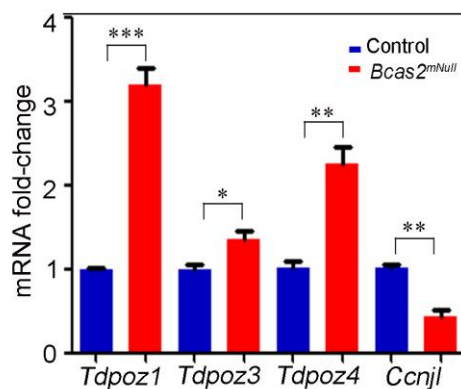

**Fig. S5.** Zygotic genome active is partially impaired in *Bcas2<sup>mNull</sup>* two-cell embryos. Levels of *Tdpoz1*, *Tdpoz3*, *Tdpoz4*, *Ccnjl* and *Gm13043* were measured by qRT-PCR with specific primers (Table S 4) in two-cell embryos obtained at 48 hrs post-hCG. The error bars represent the SEM from three independent experiments. \*,  $P < 0.05$ ; \*\*,  $P < 0.01$ ; \*\*\*,  $P < 0.001$ .

Figure S6

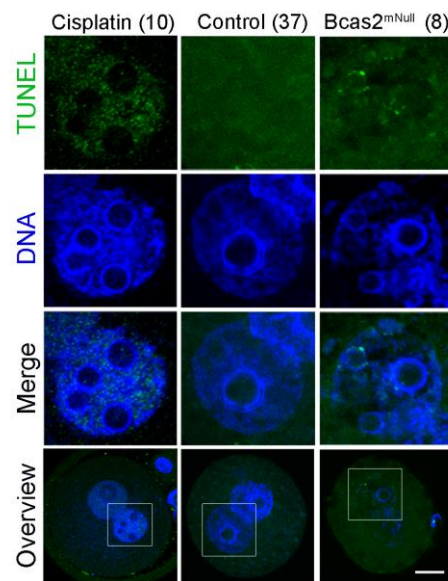

**Fig. S6. BCAS2 is required for DNA repair in mouse zygotes.** Control and BCAS2<sup>mNull</sup> zygotes were obtained 30 hrs post-hCG and examined by TUNEL assay. Normal zygotes treated with Casplatin as the positive control.

Figure S7

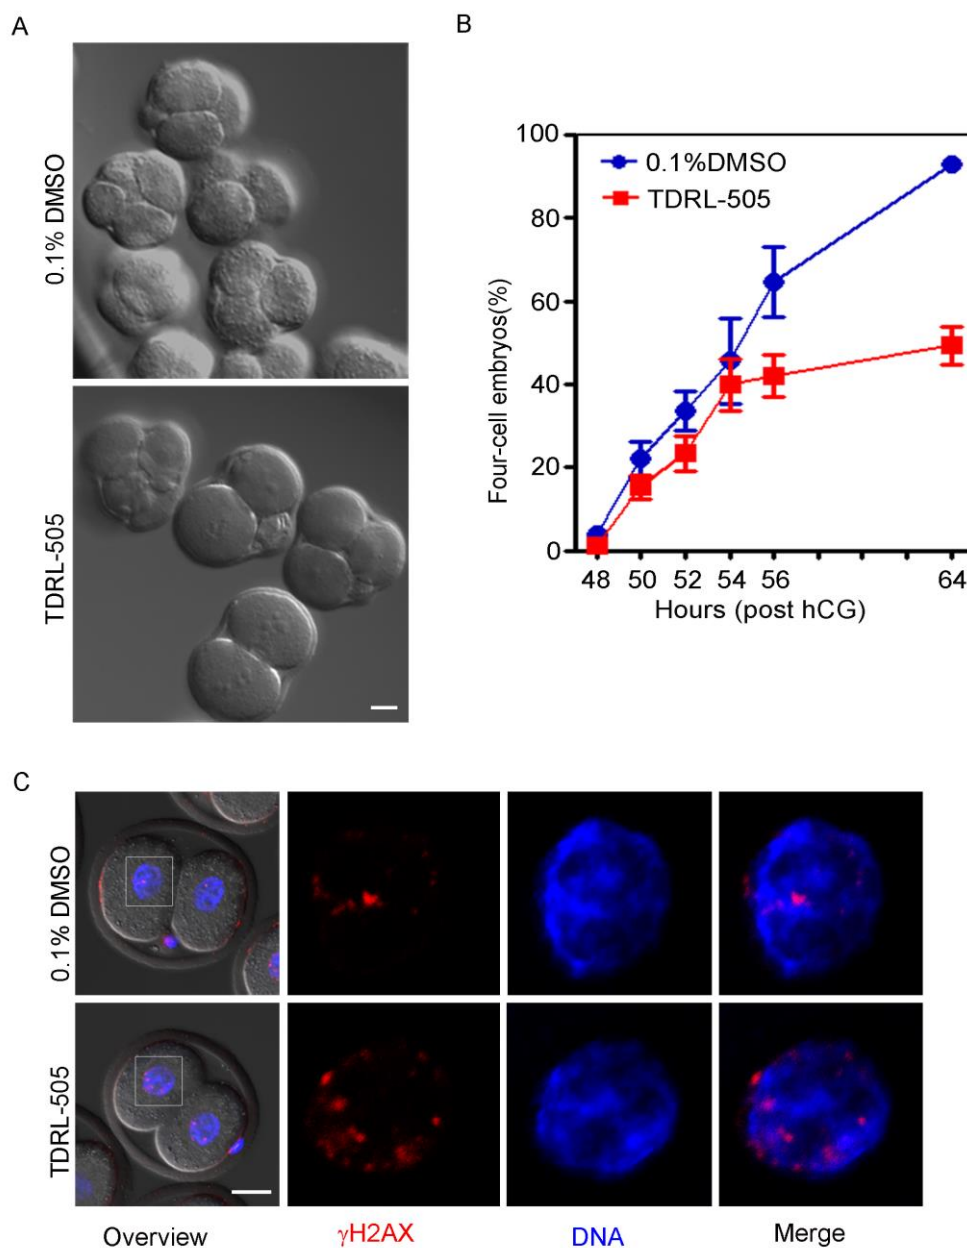

**Fig. S7. RPA inhibition induces developmental arrest and increased  $\gamma$ H2AX at two-cell stage.** (A) Normal zygotes were recovered 23 hrs post-hCG. Zygotes were treated with either 0.1% DMSO as control (n=65) or 100  $\mu$ M TDRL-505 (n=68) for 5 hrs and released. Zygotes were allowed to progress to the four-cell stage. (B) Quantification of (A) developmental rate



during the transition from the two- to four-cell stage. Developmental rates were calculated without the amount of arrested two-cell embryos. Error bars represented SEM. (C) Two-cell embryos from (B) were fixed after 48 hours post-hCG and immunostained with  $\gamma$ H2AX. Scale bar, 20  $\mu$ m.

### Supplementary Table S1

PCR primers used for gene targeting at Bcas2 locus and genotyping.

| Primer      | 5'→3'                                                                      |
|-------------|----------------------------------------------------------------------------|
| SphI-Loxp-F | ACAGCATGCATAACTTCGTATAGCATACATTATACGAAG<br>TTATGTTTTTAAGTGGTTATTCTACAAGTGC |
| NotI-R      | GAATTCGCGGCCGCTGTAGTTCTGAGACAATCCC                                         |
| Not-F       | GAATTCGCGGCCGCGGTGCCAACGACAGTGTTTTTC                                       |
| SphI-R:     | ACAGCATGCAGTTAGACATGCTTGTTTCAGGC                                           |
| BamHI-F:    | TCGGATCCCAACGAAAGGCTACCTTGAG                                               |
| XhoI-R:     | TCCTCGAGCTAACTGTGAAGGTGTGTCAG                                              |
| Neo-F:      | TATCGCCTTCTTGACGAGTTC                                                      |
| screen-R    | TTGGTCCTGCAGTCCAAATC                                                       |
| F-WT        | ATTCCAGCAGTTGGTGTGGG                                                       |
| F2-KO       | AGGTGTATGAATGCCTGAACAAG                                                    |
| R           | CATTGCTGGACAGAAGGTGAG                                                      |

**Supplementary Table S2**

Antibodies used in this study:

| Name                                                             | Dilution | Application |
|------------------------------------------------------------------|----------|-------------|
| anti-BCAS2 (Protein Tech Group, 10414)                           | IF       | 1: 200      |
|                                                                  | WB       | 1:600       |
| anti-phosphor-p53 on Ser15 (Cell Signaling, 9284)                | IF       | 1:100       |
|                                                                  | WB       | 1:1000      |
| anti- $\gamma$ H2AX antibody (Cell signaling, 22551)             | IF       | 1: 500      |
|                                                                  | WB       | 1:1000      |
| phosphor-RPA2 (Bethyl Laboratories, A300-245A)                   | IF       | 1:100       |
| anti- $\beta$ -Actin monoclonal antibody (ZSGB-BIO, ZM0002 )     | WB       | 1: 5000     |
| Alexa 488 donkey anti-rabbit (Jackson, 711545152)                | IF       | 1:1000      |
| Alexa 633 donkey anti-mouse (Jackson, A-21050)                   | IF       | 1:200       |
| HRP-conjugated anti-mouse (ZSGB-BIO; 2304)                       | WB       | 1:5000      |
| HRP-conjugated anti-rabbit secondary antibodies (ZSGB-BIO; 2301) | WB       | 1:5000      |

Abbreviation: IF, immunofluorescence staining; WB, western blotting.

**SupplementaryTable S3**

Primer sequences for *Bcas2* and *Rpa2* mutations:

| Gene                  | Forward (5'→3')                                      | Reverse (5'→3')                                   |
|-----------------------|------------------------------------------------------|---------------------------------------------------|
| <i>Bcas2</i>          | TAGAATTCGCCACCATGG<br>GGGCACGGGCTTGGTAG<br>CCGGAGAGG | TACCGCGGGAAGTCTTGG<br>CGGATGTTTTCTTGTG<br>GCCTCCC |
| ΔN                    | GAATTCGCCACCATGGCG<br>GCACGGGCTTGGT                  | TTGACCGCGGTCATTCTC<br>TCAGCTTAGATC                |
| <i>Rpa2</i>           | TGCGGATATCATGTGGAA<br>TAGCGGATTCGA                   | AGGAGGCGCGCCTCACT<br>CTGCATCTGTAGACT              |
| <i>Rpa2</i> (S4A/S8A) | AGGTGGAGCTGCTGAAG<br>CCTTCGAATCCGCCATTC<br>CACAT     | ATGTGGAATGGCGGATTC<br>GAAGGCTTCAGCAGCTCC<br>ACCT  |
| <i>Rpa2</i> (S33A)    | CTCGATTTCTTCTCCGCC<br>TGCGCCGGTGTGGGCGA<br>CCCGA     | TCGGGTCGCCCACACCG<br>GCGCAGGCGGAGAAGAA<br>ATCGAG  |
| <i>Rpa2</i> (Thr21A)  | CCGAAGCCACCGGGGGA<br>CTGCGCGTAGCCGCCTG<br>CTCCGCC    | GGCGGAGCAGGCGGCTA<br>CGCGCAGTCCCCCGGTG<br>GCTTCGG |

**Supplementary Table S4**

Primers for qRT-PCR assay:

| Gene           | Forward (5'→3')                 | Reverse (5'→3')                 |
|----------------|---------------------------------|---------------------------------|
| <i>Bcas2</i>   | 5'TCGCTGCTCGACAACCG<br>ATTGAA3' | 5'AGCTGCATGTTCTTTCGCTG<br>CCA3' |
| <i>P21</i>     | 5'GCAGCCGAGAGGTGTG<br>AGCC3'    | 5'CGGGACCGAAGAGACAAC<br>GGC3'   |
| <i>Gadd45a</i> | CTGCAGAGCAGAAGACCG<br>AA        | TACACGCCGACCGTAATGG             |
| <i>Tdpoz1</i>  | TCAGAGAAGGATTACAAG<br>CCCA      | GGCTGAGCAAACTAGGTAA<br>ACT      |
| <i>Tdpoz3</i>  | CCTGTCAGTTTATCTGGAG<br>TTGC     | CAGAAAGCATTGGACATTGG<br>AGA     |
| <i>Tdpoz4</i>  | GCCCAAGTGCTAACACCA<br>GA        | TCCCACAGCTCCCCTACGT             |
| <i>Ccnj1</i>   | TGGCATATCGGGACTCGT<br>TG        | ATATCCAAGGGCTGGAGGGT            |
| <i>Gm13043</i> | GCCCCACTCTATCTGTTTT<br>GC       | AACGAATCCTCCTCCTATTTA<br>CTG    |
